# Supplementary material for: Metformin Improves Neurologic Outcome Via AMP‐Activated Protein Kinase–Mediated Autophagy Activation in a Rat Model of Cardiac Arrest and Resuscitation
Source: PubMed Central journal article supplement — J Am Heart Assoc. 2018 Jun 12;7(12):e008389. doi: 10.1161/JAHA.117.008389 (PMC6220525; doi:10.1161/jaha.117.008389), 2018-06-12
Supplement: JAH3-7-e008389-s001.pdf [file JAH3-7-e008389-s001.pdf]

# **SUPPLEMENTAL MATERIAL**

Figure S1. Experimental procedures and flow diagram of the Met-pretreated study.

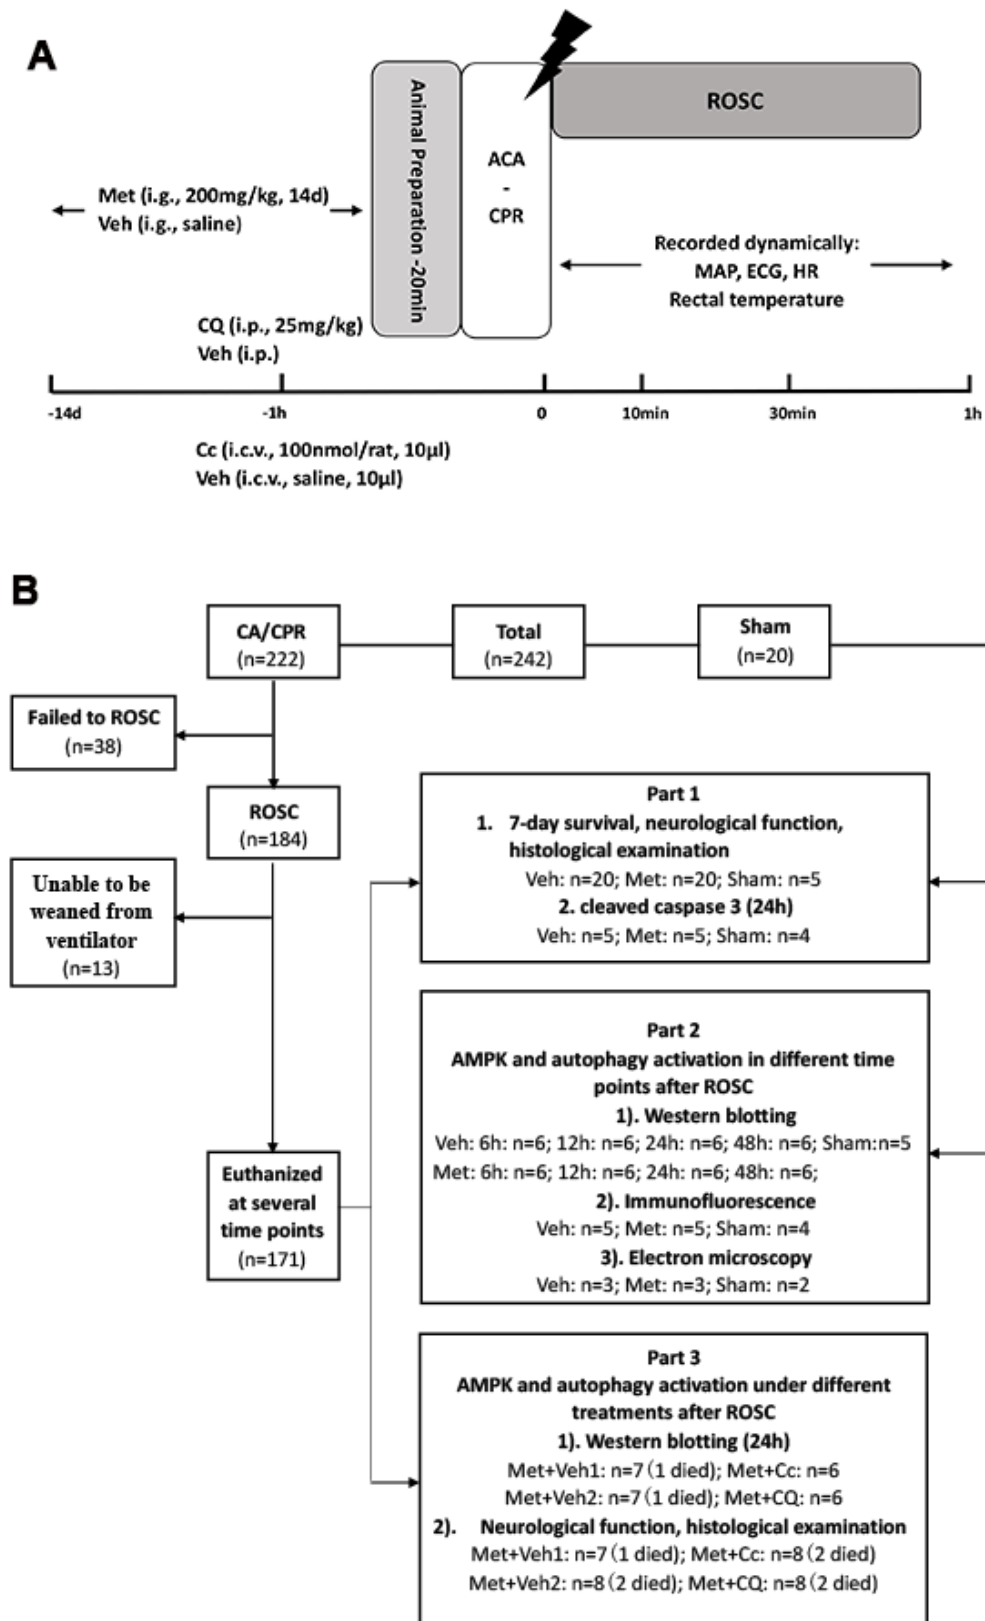

(A) Experimental procedures and measurements during the phases of equilibrium,

asphyxial cardiac arrest and cardiopulmonary resuscitation (CA/CPR) and return of spontaneous circulation (ROSC). **(B)** Flow diagram of the experiment. The whole study consists of 3 parts. In part 1, 7-day survival, neurofunction and histological changes were observed at day 7 after ROSC, and cleaved caspase 3 was determined at 24 h after ROSC. In part 2, rats were euthanized at 6, 12, 24, 48 h or 7 days after ROSC. Met, metformin; Cc, Compound C; CQ, chloriquine; Veh, vehicle; ECG, electrocardiogram; MAP, mean arterial pressure.
